# Supplementary material for: DENV-Mimetic Polymersome Nanoparticles Bearing Multi-Epitope Lipopeptides Antigen as the Next-Generation Dengue Vaccine
Source: MDPI journal article supplement (doi:10.3390/pharmaceutics14010156), 2022-01-10
Supplement: s1 [file s1]

# Supplementary materials: DENV-Mimetic Polymersome Nanoparticles Bearing Multi-Epitope Lipopeptides Antigen as the Next-Generation Dengue Vaccine

Nur Adilah Abdul Rahman, Abdin Shakirin Mohamad Norpi, Muhammad Luqman Nordin, Mohd Cairul Iqbal Mohd Amin, Abdullah Al-Hadi Ahmad Fuaad, Nor Azila Muhammad Azami, Nirmal Marasini and Fazren Azmi

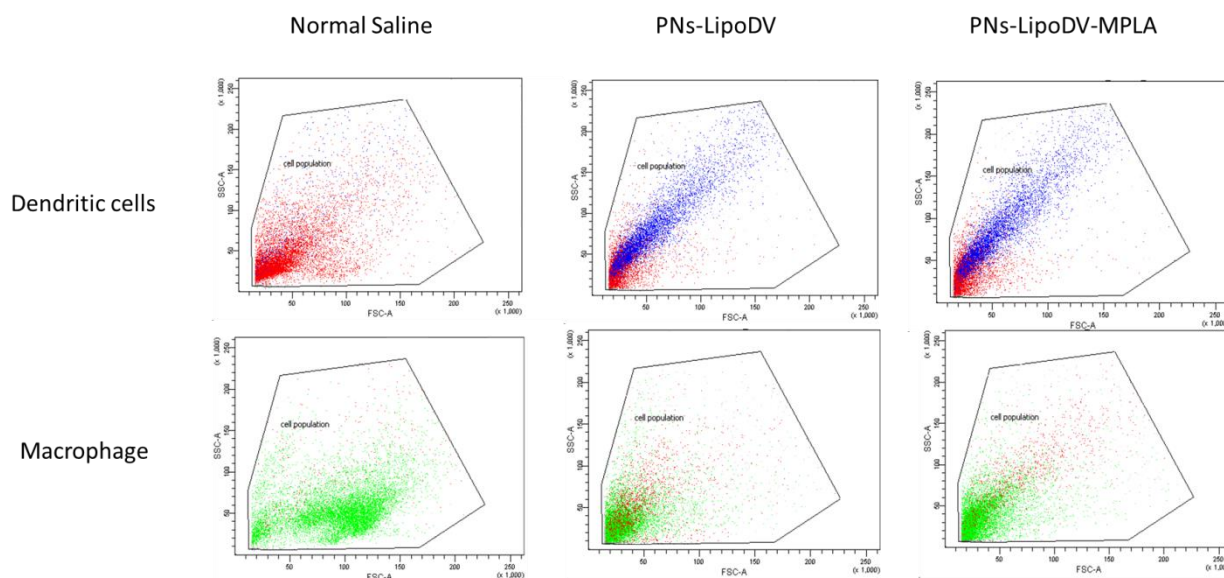

**Figure S1.** Cell populations from flow cytometry analysis of the dendritic cells and macrophage following incubation with PNs-based nanoparticles.

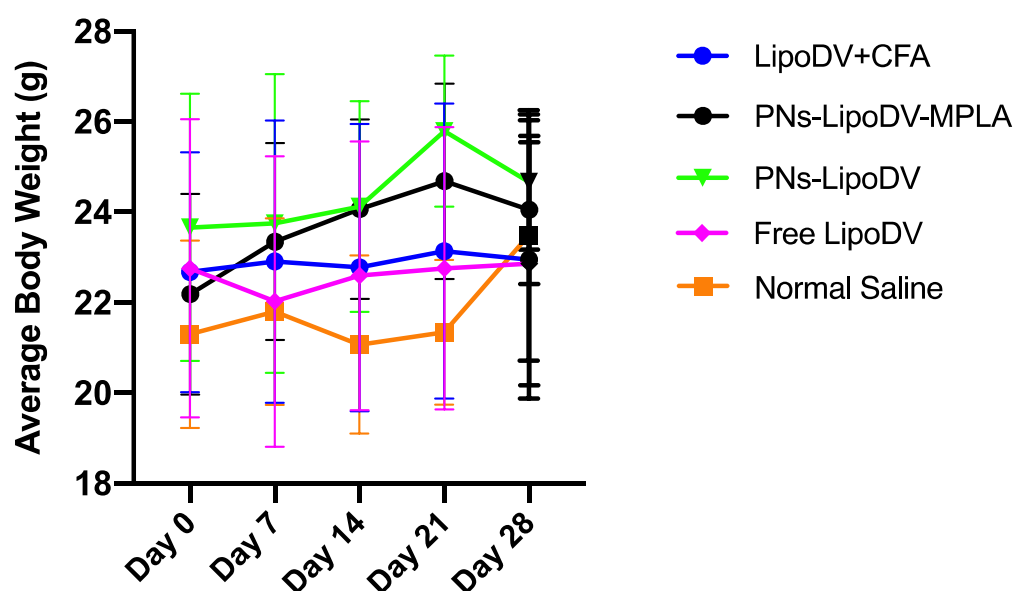

**Figure S2.** The average body weight changes of mice before and after immunization with the tested vaccine candidates.

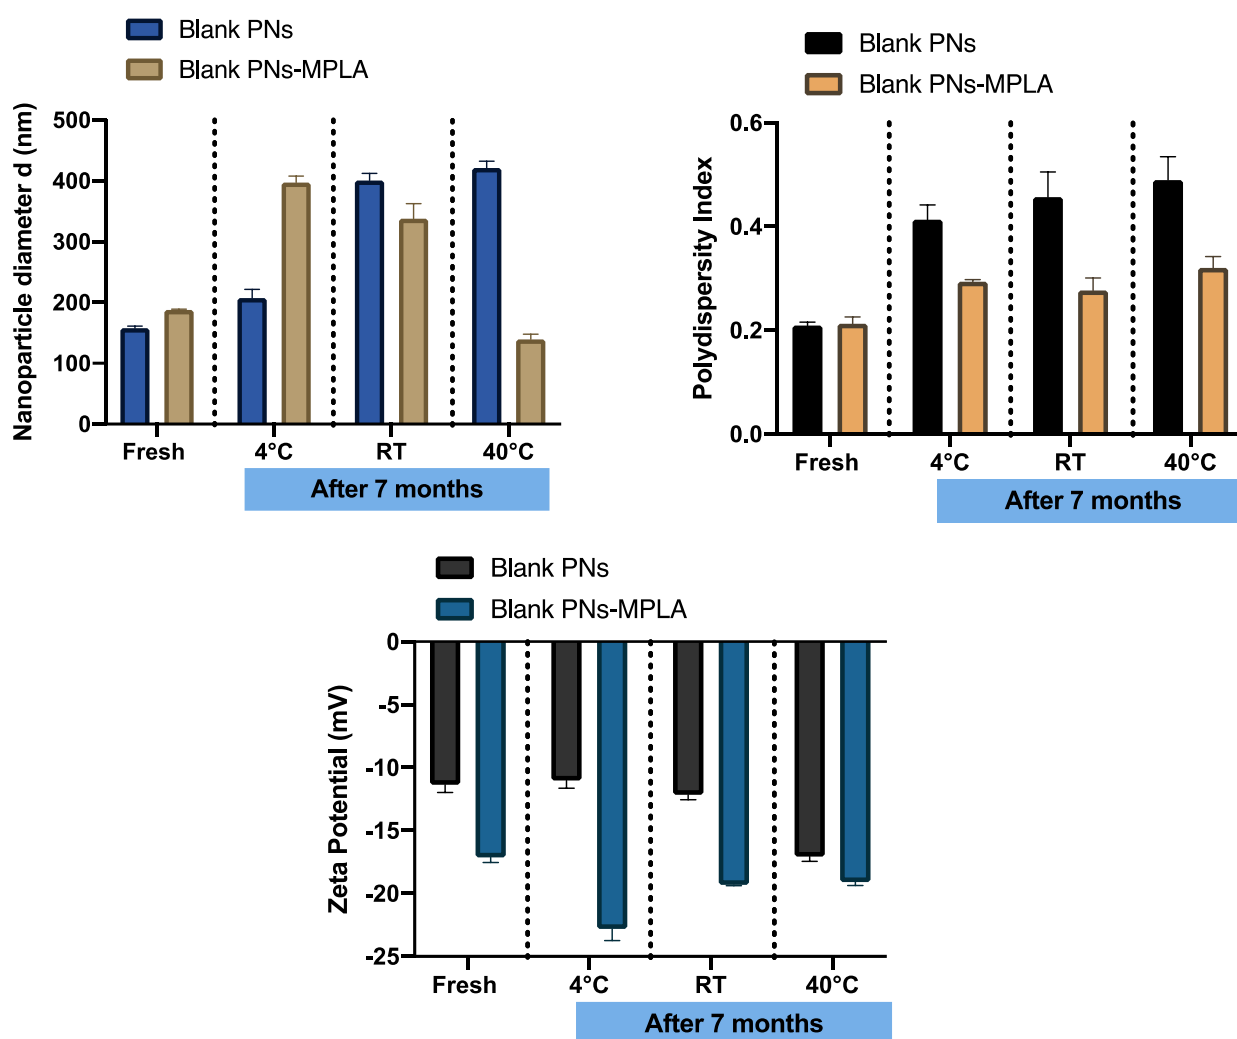

**Figure S3.** The stability of blank polymersome nanoparticle formulations (with and without the presence of MPLA coating). The particle's size diameter, PDI and zeta potential were measured after 7 months under different temperature conditions (4 °C, room temperature and 40 °C).
